# Supplementary material for: Rapid and Sensitive Detection of Pentachloronitrobenzene by Surface-Enhanced Raman Spectroscopy Combined with Molecularly Imprinted Polymers
Source: MDPI journal article supplement (doi:10.3390/bios12020052), 2022-01-19
Supplement: s1 [file s1]

# Supplementary material: Rapid and Sensitive Detection of Pentachloronitrobenzene by Surface-Enhanced Raman Spectroscopy Combined with Molecularly Imprinted Polymers

**Table S1.** Temperature program of the GC-MS column.

| Procedure | Temperature (°C) | Time (min) | Heating rate (°C/min) |
|-----------|------------------|------------|-----------------------|
| 1         | 40               | 1          | 40                    |
| 2         | 120              | 1          | 5                     |
| 3         | 240              | 1          | 12                    |
| 4         | 300              | 6          |                       |

In section 2.6, the heating procedure of chromatographic column is shown in Table S1.

**Table S2.** Percentage recoveries and relative standard deviation (RSD) of the detection of PCNB spiked in toluene samples (mean  $\pm$  SD, N = 3).

| Concentration of PCNB solution ( $\mu\text{g/mL}$ ) | Found $\pm$ SD ( $\mu\text{g/mL}$ ) | Recovery (%) | RSD (%) |
|-----------------------------------------------------|-------------------------------------|--------------|---------|
| 0.130                                               | 0.128 $\pm$ 0.078                   | 98.5         | 6.1     |
| 0.080                                               | 0.076 $\pm$ 0.032                   | 95.0         | 4.3     |
| 0.040                                               | 0.030 $\pm$ 0.016                   | 102.7        | 3.9     |

In section 3.5, Table S2 summarizes the recovery and the relative standard deviation (RSD) of the detection of PCNB.

**Table S3.** Recovery and precision analysis of detection of spiked PCNB in rice using MIPs as SERS substrates.

| Rice Sample | Spiked ( $\mu\text{g/mL}$ ) | Found $\pm$ SD ( $\mu\text{g/mL}$ ) | Recovery (%) | RSD (%) |
|-------------|-----------------------------|-------------------------------------|--------------|---------|
| 1           | 0.120                       | 0.113 $\pm$ 0.052                   | 94.4         | 4.6     |
| 2           | 0.060                       | 0.059 $\pm$ 0.027                   | 97.5         | 4.7     |
| 3           | 0.030                       | 0.031 $\pm$ 0.023                   | 103.3        | 7.4     |

In section 3.6, The MIPs were further applied to detect PCNB spiked in rice (Hangzhou Rice Technology Co., Ltd.). As shown the recoveries of samples and the values of RSD were found in Table S3.

**Table S4.** Recovery and precision analysis of detection of PCNB spiked in rice using GC-MS.

| Rice Sample | Spiked ( $\mu\text{g/mL}$ ) | Found $\pm$ SD ( $\mu\text{g/mL}$ ) | Recovery (%) | RSD (%) |
|-------------|-----------------------------|-------------------------------------|--------------|---------|
| 1           | 0.120                       | 0.114 $\pm$ 0.001                   | 94.8         | 0.97    |
| 2           | 0.060                       | 0.057 $\pm$ 0.0008                  | 95.8         | 1.39    |
| 3           | 0.030                       | 0.290 $\pm$ 0.0003                  | 96.7         | 1.03    |

In section 3.7, the recoveries of samples and the values of RSD were demonstrated in Table S4.

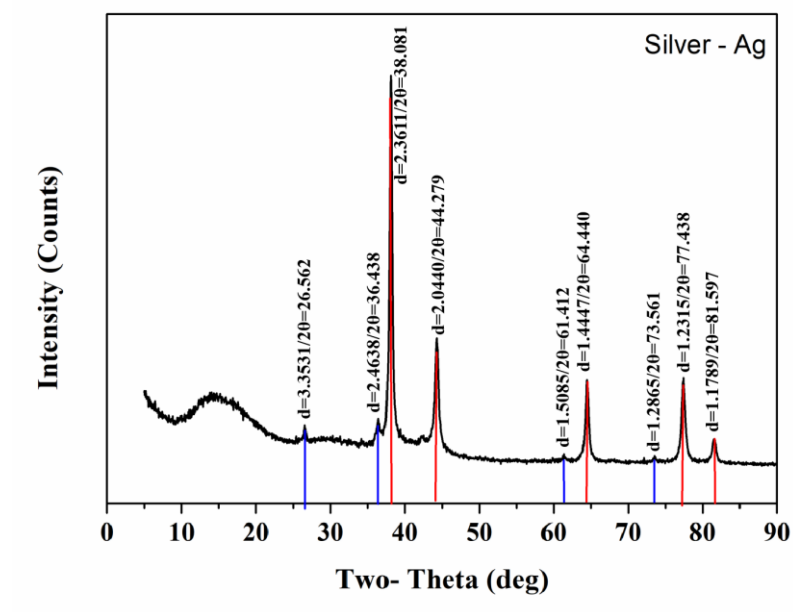

**Figure S1.** XRD pattern of the Ag NPs-embedded MIPs.

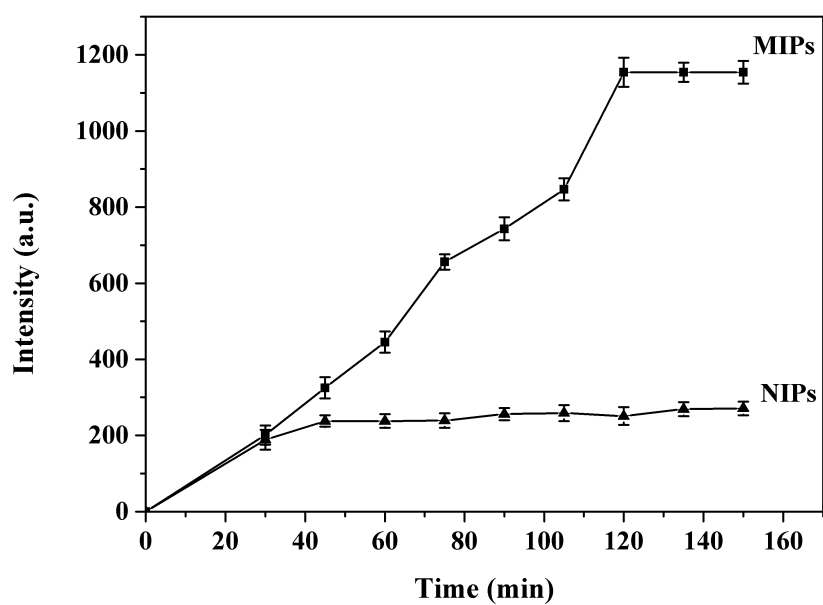

**Figure S2.** Kinetic adsorption test of MIPs versus NIPs. The characteristic PCNB peak intensity at  $1600\text{ cm}^{-1}$  was plotted against the adsorption time. Initial concentration of PCNB was  $1.0\text{ }\mu\text{g/mL}$ . Time points were 30, 45, 60, 75, 90, 105, 120, 135, 150 min.

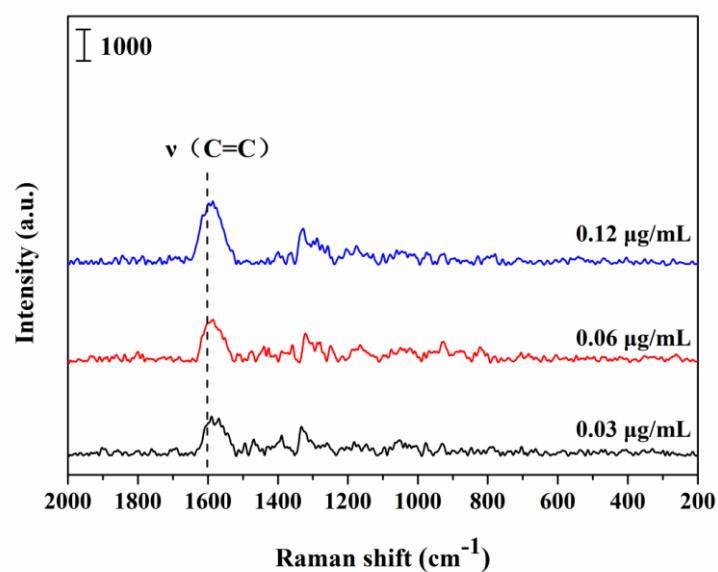

Figure S3. Spectra of PCNB in rice detected by SERS-MIPs method.

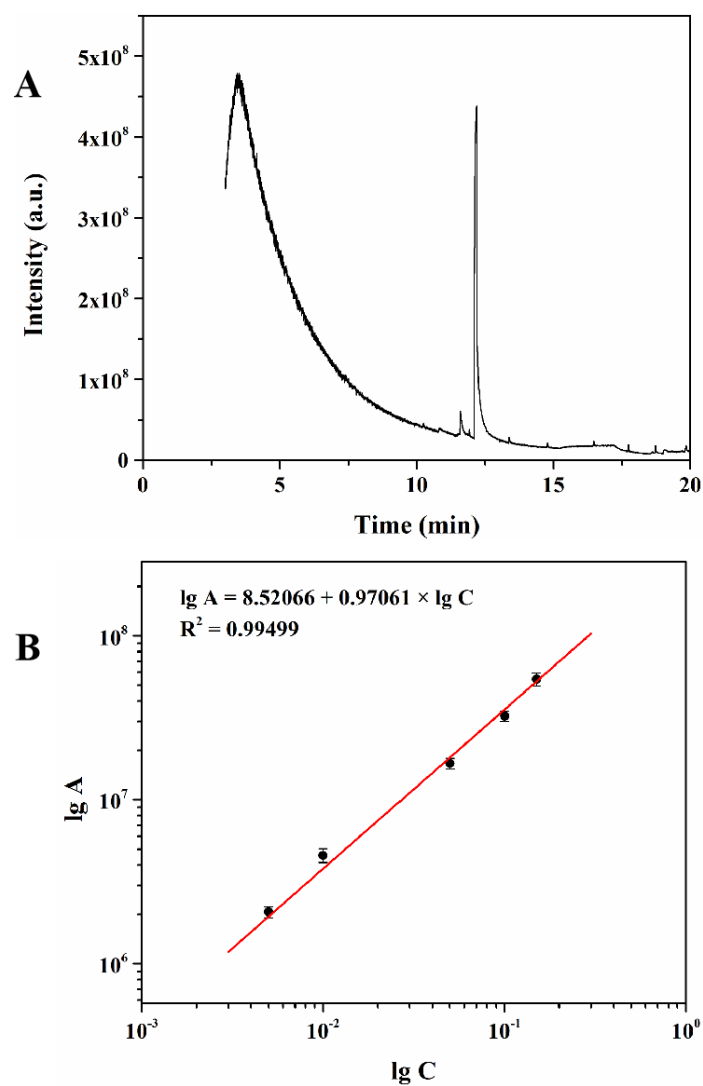

Figure S4. (A) GC-MS chromatogram of 20.0 µg/mL PCNB solution. (B) Standard curve for detecting PCNB in rice by GC-MS.

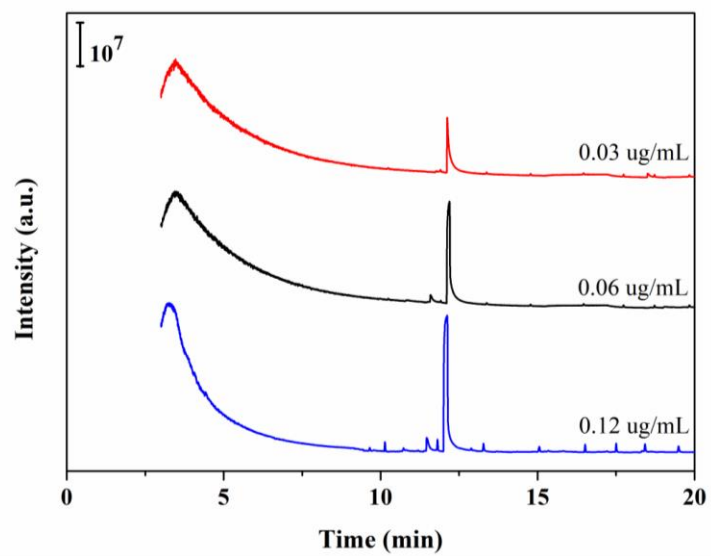

**Figure S5.** The chromatogram of PCNB in rice measured by GC-MS.
